# Supplementary material for: Diminished socially selective neural processing in 5‐month‐old infants at high familial risk of autism
Source: PubMed Central journal article supplement (PMC5943701; doi:10.1111/ejn.13751), 2017-11-22
Supplement: EJN-47-720-s002.pdf [file EJN-47-720-s002.pdf]

## B) Supplementary analysis: Analysis of Group and Conditional differences in Stimulus Attention

To ensure that our results were not confounded by group or condition differences in stimulus attention, we performed additional analyses on the video coding data. More specifically, we determined the percentage of looking for all of the social, non-social, and baseline blocks and compared the average looking time between blocks and between the high- and low-risk infant groups. An overview of the average looking time per Block can be found in the table below (Table BT1). Importantly, infants' average looking time for the social and non-social stimuli exceeded 80% which is comparable to previous studies (Shimada & Hiraki, 2006) and suggests that infants were generally very attentive in the current study.

To assess condition differences, group differences and interaction effects, we performed a 3x2 repeated measures ANOVA with Block (social vs. non-social vs. baseline) as within subject factor and Group (High-risk vs. Low-risk) as between subject factor. There was no main effect of Group ( $F(1,27)=0.31$ ,  $p=0.58$ ) and no interaction between Group and Block ( $F(2,54)=1.25$ ,  $p=0.30$ ). We found a significant main effect of Block ( $F(2,54)=27.08$ ,  $p<0.01$ ). Paired-sample t-tests showed that there was no difference between Looking Time during social and non-social blocks ( $t(28)=0.81$ ,  $p=0.43$ ) but that infants' Looking Time was lower for the baseline blocks compared to the social ( $t(28)=5.65$ ,  $p<0.01$ ) and non-social ( $t(28)=7.56$ ,  $p<0.01$ ) blocks. Given the nature of the stimuli (dynamic videos vs. static baseline stimuli) a difference between looking time between the two dynamic conditions and the baseline is expected. More importantly, the absence of a difference between the two conditions and between the two groups suggest that attentional effects are unlikely to have influenced the current results.

*Table BT1. Overview of the average Looking Time per Block and infant group*

|           | Social        | NonSocial     | Baseline      |
|-----------|---------------|---------------|---------------|
| Low-risk  | 86.84 (10.34) | 81.87 (11.51) | 70.67 (11.62) |
| High-risk | 81.12 (10.42) | 82.19 (12.85) | 69.79 (13.78) |
| Total     | 83.68 (10.60) | 82.05 (12.05) | 70.18 (12.64) |
